# Supplementary material for: The tongue microbiome of young patients with chronic kidney disease and their healthy mothers
Source: Springer Nature journal article supplement (doi:10.1007/s00784-024-05492-x), 2024-01-24
Supplement: MOESM1 [file 26657820]

**The tongue microbiome of young patients with chronic kidney disease  
and their healthy mothers**

**Karolin C. Höfer<sup>1\*</sup>, Lutz T. Weber<sup>2</sup>, Greta Barbe<sup>1</sup>, Isabelle Graf<sup>3</sup>, Stefanie Thom<sup>4</sup>, Angela Nowag<sup>4</sup>, Claus J. Scholz<sup>4</sup>, Hilmar Wisplinghoff<sup>4,6</sup>, Michael J. Noack<sup>1</sup>, Nathalie Jazmati<sup>4,5</sup>**

**\* Corresponding author:**

Dr. Karolin C. Höfer,

University of Cologne, Polyclinic for Operative Dentistry and Periodontology

Kerpener Str. 32, 50931 Cologne, Germany

Phone: 0049 221 478 96743

Fax number: 0049 221 478 96755

E-mail: karolin.hoefer@uk-koeln.de

ORCID ID: 0000-0001-8284-9849

**Online Resources**

This supplementary material is hosted by the **Journal Clinical Oral Investigations** as supporting information alongside the article **“The tongue microbiome of young patients with chronic kidney disease and their healthy mothers”** on behalf of the authors, who remain responsible for the accuracy and appropriateness of the content. The same standards for ethics, copyright, attributions and permissions as for the article apply.

Online Resource 1: Rarefaction analysis for species level analysis

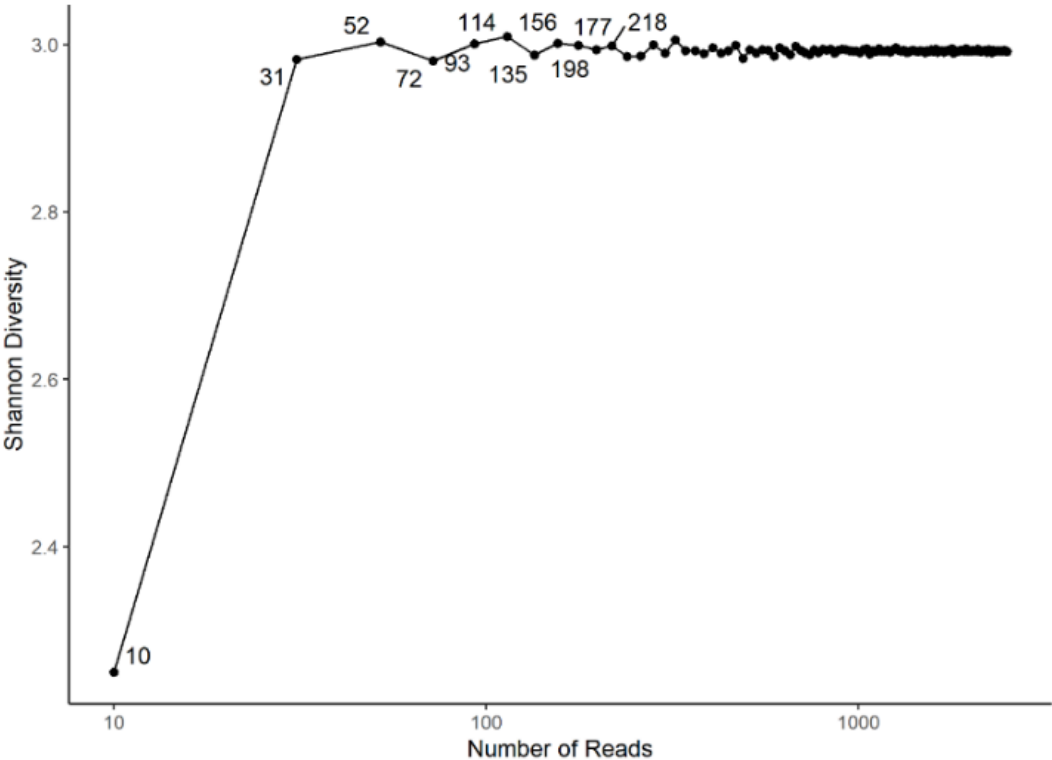

**Supplementary table 1: Relative abundance at phylum level**

| Phylum            | CKD patients |           | healthy mothers<br>(control group) |           | p-value         | FDR             | core_FDR        |
|-------------------|--------------|-----------|------------------------------------|-----------|-----------------|-----------------|-----------------|
|                   | mean %       | sd %      | mean %                             | sd %      |                 |                 |                 |
| Firmicutes        | 46.247860    | 15.988630 | 50.210271                          | 14.647262 | 0.364820        | 0.521536        | 1.000000        |
| Proteobacteria    | 23.647833    | 15.510258 | 12.106690                          | 10.516507 | <b>0.002656</b> | <b>0.037183</b> | <b>0.013280</b> |
| Bacteroidota      | 15.084620    | 10.191141 | 17.803471                          | 10.876416 | 0.372526        | 0.521536        | 1.000000        |
| Actinobacteriota  | 10.954113    | 8.944728  | 16.001057                          | 13.416567 | 0.141941        | 0.521536        | 0.567764        |
| Fusobacteriota    | 2.485070     | 1.866143  | 2.276705                           | 2.214216  | 0.726448        | 0.726448        | 1.000000        |
| Campilobacterota  | 0.894623     | 0.819168  | 0.600381                           | 0.626991  | 0.153043        | 0.521536        | NA              |
| Patescibacteria   | 0.676200     | 0.746077  | 0.988743                           | 0.954531  | 0.217236        | 0.521536        | NA              |
| Cyanobacteria     | 0.006077     | 0.020275  | 0.008886                           | 0.020441  | 0.630408        | 0.678901        | NA              |
| Spirochaetota     | 0.003037     | 0.006699  | 0.002124                           | 0.004460  | 0.561906        | 0.655557        | NA              |
| Synergistota      | 0.000523     | 0.001933  | 0.001514                           | 0.003734  | 0.274025        | 0.521536        | NA              |
| Desulfobacterota  | 0.000033     | 0.000183  | 0.000086                           | 0.000271  | 0.445554        | 0.567069        | NA              |
| Myxococcota       | 0.000013     | 0.000073  | 0.000000                           | 0.000000  | 0.325582        | 0.521536        | NA              |
| Bdellovibrionota  | 0.000000     | 0.000000  | 0.000010                           | 0.000044  | 0.329257        | 0.521536        | NA              |
| Verrucomicrobiota | 0.000000     | 0.000000  | 0.000081                           | 0.000371  | 0.329257        | 0.521536        | NA              |

**Supplementary table 2: Relative abundance at genus level**

| Genus                   | CKD patients |           | healthy mothers<br>(control group) |           | p-value         | FDR      | core_FDR |
|-------------------------|--------------|-----------|------------------------------------|-----------|-----------------|----------|----------|
|                         | mean %       | sd %      | mean %                             | sd %      |                 |          |          |
| Streptococcus           | 28.442547    | 16.543809 | 31.883014                          | 18.533093 | 0.499429        | 0.620592 | 1.000000 |
| Neisseria               | 15.865013    | 11.302233 | 7.925243                           | 8.175825  | <b>0.005416</b> | 0.493885 | 0.108322 |
| Prevotella              | 12.384470    | 10.189428 | 16.402224                          | 11.098937 | 0.195666        | 0.493885 | 1.000000 |
| Rothia                  | 7.322763     | 9.037988  | 8.701648                           | 8.280824  | 0.575875        | 0.683242 | 1.000000 |
| Veillonellaceae         | 6.875607     | 4.974429  | 7.083400                           | 5.034429  | 0.884779        | 0.899222 | 1.000000 |
| Haemophilus             | 3.464123     | 2.953565  | 1.878171                           | 1.890429  | <b>0.023658</b> | 0.493885 | 0.449510 |
| Granulicatella          | 2.710783     | 1.856053  | 2.621348                           | 2.062683  | 0.874669        | 0.899222 | 1.000000 |
| Actinomyces             | 2.218410     | 2.362723  | 2.384510                           | 2.427366  | 0.809063        | 0.853785 | 1.000000 |
| Gemella                 | 1.854873     | 1.767279  | 2.291067                           | 2.574191  | 0.505435        | 0.624361 | 1.000000 |
| Fusobacterium           | 1.665900     | 1.354008  | 1.260295                           | 1.255878  | 0.277604        | 0.493885 | 1.000000 |
| Porphyromonas           | 1.255840     | 1.680330  | 0.844024                           | 1.512985  | 0.365630        | 0.510700 | 1.000000 |
| Moraxella               | 1.009257     | 3.384791  | 0.003676                           | 0.011337  | 0.114512        | 0.493885 | 1.000000 |
| Alloprevotella          | 0.980367     | 1.244983  | 0.402452                           | 0.869561  | 0.056692        | 0.493885 | 0.963760 |
| Campylobacter           | 0.894547     | 0.819076  | 0.600138                           | 0.627093  | 0.152821        | 0.493885 | 1.000000 |
| Microbacterium          | 0.840273     | 1.340528  | 3.866505                           | 9.450591  | 0.160166        | 0.493885 | 1.000000 |
| Leptotrichia            | 0.818367     | 1.215076  | 1.016386                           | 1.682206  | 0.647243        | 0.729783 | 1.000000 |
| Pasteurella             | 0.572793     | 0.788168  | 0.348310                           | 0.572464  | 0.244485        | 0.493885 | 1.000000 |
| Enterococcus            | 0.559360     | 0.418146  | 0.385290                           | 0.355274  | 0.116330        | 0.493885 | 1.000000 |
| Lachnoclostridium       | 0.557210     | 0.731125  | 0.238152                           | 0.280565  | <b>0.035805</b> | 0.493885 | 0.644497 |
| Lachnoanaerobaculum     | 0.530877     | 0.849796  | 0.597938                           | 1.890943  | 0.880279        | 0.899222 | 1.000000 |
| Peptostreptococcaceae   | 0.455550     | 1.153334  | 0.408090                           | 1.165383  | 0.886376        | 0.899222 | NA       |
| Capnocytophaga          | 0.421220     | 0.731407  | 0.136071                           | 0.286112  | 0.060113        | 0.493885 | NA       |
| Oribacterium            | 0.396983     | 0.751712  | 0.249490                           | 0.398218  | 0.368606        | 0.510700 | NA       |
| Lactobacillus           | 0.334533     | 0.285686  | 0.395319                           | 0.388942  | 0.545737        | 0.654885 | NA       |
| Saccharimonadaceae_TM7x | 0.329827     | 0.482259  | 0.557190                           | 0.636790  | 0.175610        | 0.493885 | NA       |
| Serratia                | 0.322407     | 0.491028  | 0.193767                           | 0.340440  | 0.274612        | 0.493885 | NA       |
| UCG 14                  | 0.322387     | 0.493788  | 0.142710                           | 0.211955  | 0.083427        | 0.493885 | NA       |
| Solobacterium           | 0.264917     | 0.350750  | 0.224710                           | 0.295646  | 0.660280        | 0.729783 | NA       |
| Veillonellaceae         | 0.261390     | 0.498347  | 0.530724                           | 0.646216  | 0.117296        | 0.493885 | NA       |
| Atopobium               | 0.217883     | 0.328266  | 0.264895                           | 0.357226  | 0.635126        | 0.729783 | NA       |
| Saccharimonadales       | 0.181223     | 0.288055  | 0.264567                           | 0.351789  | 0.376156        | 0.512940 | NA       |
| Acinetobacter           | 0.181077     | 0.348150  | 0.113976                           | 0.259462  | 0.434354        | 0.560714 | NA       |
| Veillonellaceae         | 0.175473     | 0.853846  | 0.023324                           | 0.047172  | 0.338100        | 0.496614 | NA       |
| Catonella               | 0.160323     | 0.563498  | 0.027514                           | 0.033363  | 0.207935        | 0.493885 | NA       |
| Butyrivibrio            | 0.147863     | 0.492003  | 0.063748                           | 0.113142  | 0.373052        | 0.512033 | NA       |
| Selenomonadaceae        | 0.123413     | 0.199887  | 0.297290                           | 0.642246  | 0.242262        | 0.493885 | NA       |
| Stomatobaculum          | 0.115917     | 0.186597  | 0.180648                           | 0.223924  | 0.284029        | 0.493885 | NA       |
| Lautropia               | 0.098417     | 0.259821  | 0.024948                           | 0.053585  | 0.142309        | 0.493885 | NA       |
| Anaerovoracaceae        | 0.089167     | 0.143339  | 0.939876                           | 3.830324  | 0.321144        | 0.493885 | NA       |
| Rodentibacter           | 0.085283     | 0.192018  | 0.006524                           | 0.023898  | <b>0.033890</b> | 0.493885 | NA       |
| Aggregatibacter         | 0.078743     | 0.113744  | 0.024395                           | 0.048475  | <b>0.024582</b> | 0.493885 | NA       |
| Actinobacillus          | 0.075360     | 0.128902  | 0.107352                           | 0.456606  | 0.757584        | 0.820065 | NA       |

|                            |          |          |          |          |                 |          |    |
|----------------------------|----------|----------|----------|----------|-----------------|----------|----|
| Candidatus                 | 0.071517 | 0.112281 | 0.110410 | 0.200581 | 0.427599        | 0.558417 | NA |
| Micrococcus                | 0.066310 | 0.350462 | 0.000105 | 0.000480 | 0.309364        | 0.493885 | NA |
| Saccharimonadaceae         | 0.044633 | 0.064669 | 0.041500 | 0.082388 | 0.884982        | 0.899222 | NA |
| Corynebacterium            | 0.043700 | 0.077325 | 0.134333 | 0.581247 | 0.485600        | 0.607000 | NA |
| Absconditabacteriales      | 0.035957 | 0.077903 | 0.009505 | 0.016819 | 0.080941        | 0.493885 | NA |
| Carnobacterium             | 0.030953 | 0.046241 | 0.014938 | 0.043913 | 0.216372        | 0.493885 | NA |
| Anaerovoracaceae           | 0.029753 | 0.036550 | 0.054038 | 0.148155 | 0.469821        | 0.594352 | NA |
| Peptostreptococcaceae      | 0.024457 | 0.083456 | 0.007605 | 0.020010 | 0.295270        | 0.493885 | NA |
| Mannheimia                 | 0.020463 | 0.029395 | 0.029857 | 0.118471 | 0.725439        | 0.793449 | NA |
| Staphylococcus             | 0.017343 | 0.093996 | 0.000924 | 0.002972 | 0.346906        | 0.498545 | NA |
| Trichococcus               | 0.016100 | 0.088032 | 0.002438 | 0.010210 | 0.406443        | 0.540209 | NA |
| Thiobacillus               | 0.013983 | 0.046103 | 0.000162 | 0.000742 | 0.111438        | 0.493885 | NA |
| Tannerella                 | 0.012717 | 0.032121 | 0.008062 | 0.020495 | 0.530902        | 0.642541 | NA |
| Bacteroides                | 0.012370 | 0.029616 | 0.000052 | 0.000240 | <b>0.030279</b> | 0.493885 | NA |
| Saccharimonadaceae_TM7a    | 0.011563 | 0.050188 | 0.004486 | 0.012358 | 0.463811        | 0.590305 | NA |
| Peptostreptococcaceae      | 0.010290 | 0.027939 | 0.003805 | 0.010133 | 0.250516        | 0.493885 | NA |
| Johnsonella                | 0.010110 | 0.023548 | 0.004671 | 0.010548 | 0.270971        | 0.493885 | NA |
| Shewanella                 | 0.008033 | 0.010819 | 0.000000 | 0.000000 | <b>0.000333</b> | 0.070001 | NA |
| Flavobacterium             | 0.007847 | 0.021645 | 0.006076 | 0.021029 | 0.771395        | 0.826494 | NA |
| Cardiobacterium            | 0.007413 | 0.009603 | 0.006467 | 0.014883 | 0.799228        | 0.847666 | NA |
| Lactococcus                | 0.006810 | 0.033349 | 0.000057 | 0.000262 | 0.276529        | 0.493885 | NA |
| Chloroplast                | 0.005983 | 0.020297 | 0.008852 | 0.020350 | 0.622376        | 0.726105 | NA |
| Brachymonas                | 0.005857 | 0.021772 | 0.000205 | 0.000617 | 0.165941        | 0.493885 | NA |
| Chryseobacterium           | 0.005677 | 0.020499 | 0.000881 | 0.003902 | 0.220568        | 0.493885 | NA |
| Peptostreptococcales       | 0.005547 | 0.011290 | 0.004833 | 0.019437 | 0.880802        | 0.899222 | NA |
| Peptostreptococcales       | 0.005437 | 0.010302 | 0.003971 | 0.009127 | 0.595296        | 0.698392 | NA |
| Simonsiella                | 0.004607 | 0.013088 | 0.000671 | 0.002370 | 0.117404        | 0.493885 | NA |
| Anaerovoracaceae           | 0.003837 | 0.020864 | 0.000252 | 0.001157 | 0.355469        | 0.500996 | NA |
| Acidovorax                 | 0.003817 | 0.010458 | 0.000329 | 0.001171 | 0.080189        | 0.493885 | NA |
| Defluviitaleaceae          | 0.003527 | 0.008655 | 0.002129 | 0.004008 | 0.443047        | 0.567316 | NA |
| Arcanobacterium            | 0.003320 | 0.018184 | 0.000086 | 0.000393 | 0.338170        | 0.496614 | NA |
| Abiotrophia                | 0.003313 | 0.008050 | 0.001524 | 0.004517 | 0.317061        | 0.493885 | NA |
| Bifidobacterium            | 0.003297 | 0.017720 | 0.043724 | 0.193099 | 0.350062        | 0.498545 | NA |
| Alkalibacterium            | 0.003163 | 0.006492 | 0.000000 | 0.000000 | <b>0.012329</b> | 0.493885 | NA |
| Treponema                  | 0.003037 | 0.006699 | 0.002124 | 0.004460 | 0.561906        | 0.670456 | NA |
| Globicatella               | 0.002493 | 0.006749 | 0.000371 | 0.000999 | 0.100022        | 0.493885 | NA |
| Kingella                   | 0.002403 | 0.008458 | 0.001586 | 0.003817 | 0.643563        | 0.729783 | NA |
| Anaerovoracaceae           | 0.002140 | 0.011721 | 0.002148 | 0.009030 | 0.997921        | 0.997921 | NA |
| Anaerovoracaceae           | 0.001553 | 0.007195 | 0.002586 | 0.008090 | 0.641522        | 0.729783 | NA |
| Actinomycetaceae_F0332     | 0.001280 | 0.003657 | 0.000257 | 0.000941 | 0.152230        | 0.493885 | NA |
| RF39                       | 0.001267 | 0.004872 | 0.005114 | 0.014021 | 0.239286        | 0.493885 | NA |
| Lachnobacterium            | 0.001063 | 0.005824 | 0.000195 | 0.000895 | 0.428119        | 0.558417 | NA |
| Alloscardovia              | 0.001037 | 0.005584 | 0.118943 | 0.361089 | 0.150205        | 0.493885 | NA |
| Rikenellaceae              | 0.000990 | 0.003335 | 0.000481 | 0.001687 | 0.478016        | 0.601097 | NA |
| Alysiella                  | 0.000960 | 0.004577 | 0.000943 | 0.004321 | 0.989204        | 0.993937 | NA |
| Paludibacteraceae_F0058    | 0.000753 | 0.002885 | 0.002652 | 0.007082 | 0.255869        | 0.493885 | NA |
| Lachnospiraceae            | 0.000643 | 0.003524 | 0.000476 | 0.002182 | 0.835461        | 0.877234 | NA |
| Paenarthrobacter           | 0.000630 | 0.002645 | 0.000000 | 0.000000 | 0.202223        | 0.493885 | NA |
| Bergeyella                 | 0.000613 | 0.002867 | 0.000081 | 0.000371 | 0.322816        | 0.493885 | NA |
| Aeromonas                  | 0.000567 | 0.003104 | 0.000276 | 0.001266 | 0.647383        | 0.729783 | NA |
| Fretibacterium             | 0.000523 | 0.001933 | 0.001514 | 0.003734 | 0.274025        | 0.493885 | NA |
| Clostridia_vadinBB60_group | 0.000433 | 0.001523 | 0.000043 | 0.000196 | 0.175147        | 0.493885 | NA |
| Streptobacillus            | 0.000413 | 0.001575 | 0.000000 | 0.000000 | 0.161295        | 0.493885 | NA |
| Shuttleworthia             | 0.000413 | 0.002264 | 0.001176 | 0.003629 | 0.399682        | 0.538033 | NA |
| Peptostreptococcaceae      | 0.000383 | 0.001574 | 0.000000 | 0.000000 | 0.192594        | 0.493885 | NA |
| Mycoplasma                 | 0.000367 | 0.001356 | 0.000105 | 0.000289 | 0.312737        | 0.493885 | NA |
| Actinotignum               | 0.000330 | 0.001084 | 0.000000 | 0.000000 | 0.106227        | 0.493885 | NA |
| Moryella                   | 0.000310 | 0.001698 | 0.000000 | 0.000000 | 0.325582        | 0.493885 | NA |
| Vibrio                     | 0.000303 | 0.000715 | 0.000000 | 0.000000 | <b>0.027376</b> | 0.493885 | NA |
| Sphingomonas               | 0.000300 | 0.001115 | 0.003386 | 0.014792 | 0.351355        | 0.498545 | NA |
| Scardovia                  | 0.000273 | 0.001165 | 0.000000 | 0.000000 | 0.209044        | 0.493885 | NA |
| Burkholderia               | 0.000247 | 0.001351 | 0.000114 | 0.000524 | 0.628943        | 0.729713 | NA |
| Gracilibacteria            | 0.000227 | 0.000719 | 0.000010 | 0.000044 | 0.109736        | 0.493885 | NA |
| Slackia                    | 0.000227 | 0.001242 | 0.000114 | 0.000524 | 0.660264        | 0.729783 | NA |
| Pseudomonas                | 0.000223 | 0.001060 | 0.003648 | 0.015661 | 0.329008        | 0.493885 | NA |
| Snodgrassella              | 0.000207 | 0.001132 | 0.000067 | 0.000306 | 0.523345        | 0.642541 | NA |
| Gracilibacteria_69_P22     | 0.000187 | 0.000660 | 0.000124 | 0.000342 | 0.659329        | 0.729783 | NA |
| Oceanivirga                | 0.000167 | 0.000913 | 0.000000 | 0.000000 | 0.325582        | 0.493885 | NA |
| Lactobacillales_p5D1_392   | 0.000147 | 0.000803 | 0.000000 | 0.000000 | 0.325582        | 0.493885 | NA |
| Veillonellaceae            | 0.000140 | 0.000767 | 0.000090 | 0.000415 | 0.767713        | 0.826494 | NA |
| Pelomonas                  | 0.000133 | 0.000730 | 0.000410 | 0.001877 | 0.527346        | 0.642541 | NA |
| Enhydrobacter              | 0.000127 | 0.000694 | 0.000133 | 0.000377 | 0.964990        | 0.974268 | NA |
| Eikenella                  | 0.000123 | 0.000604 | 0.000048 | 0.000218 | 0.532391        | 0.642541 | NA |
| Howardella                 | 0.000123 | 0.000676 | 0.000186 | 0.000851 | 0.781195        | 0.832745 | NA |
| Mobiluncus                 | 0.000120 | 0.000657 | 0.000705 | 0.002964 | 0.383994        | 0.520250 | NA |
| Enterobacter               | 0.000093 | 0.000413 | 0.000000 | 0.000000 | 0.225363        | 0.493885 | NA |

|                         |          |          |          |          |          |          |    |
|-------------------------|----------|----------|----------|----------|----------|----------|----|
| Nostoc                  | 0.000093 | 0.000511 | 0.000000 | 0.000000 | 0.325582 | 0.493885 | NA |
| Lentimicrobium          | 0.000083 | 0.000438 | 0.000019 | 0.000068 | 0.435221 | 0.560714 | NA |
| Polynucleobacter        | 0.000083 | 0.000456 | 0.000033 | 0.000153 | 0.580768 | 0.685175 | NA |
| Cryptobacterium         | 0.000077 | 0.000420 | 0.000100 | 0.000458 | 0.854011 | 0.892251 | NA |
| Psychrobacter           | 0.000073 | 0.000280 | 0.002324 | 0.010649 | 0.344493 | 0.498545 | NA |
| Olsenella               | 0.000070 | 0.000383 | 0.000000 | 0.000000 | 0.325582 | 0.493885 | NA |
| Tessaracoccus           | 0.000060 | 0.000242 | 0.000000 | 0.000000 | 0.184141 | 0.493885 | NA |
| Legionella              | 0.000060 | 0.000329 | 0.000000 | 0.000000 | 0.325582 | 0.493885 | NA |
| Comamonas               | 0.000060 | 0.000329 | 0.000110 | 0.000419 | 0.653580 | 0.729783 | NA |
| Buttiauxella            | 0.000053 | 0.000292 | 0.000000 | 0.000000 | 0.325582 | 0.493885 | NA |
| Candidatus              | 0.000053 | 0.000218 | 0.000095 | 0.000436 | 0.687904 | 0.756334 | NA |
| Incertae                | 0.000047 | 0.000256 | 0.000000 | 0.000000 | 0.325582 | 0.493885 | NA |
| Mitochondria            | 0.000043 | 0.000237 | 0.000000 | 0.000000 | 0.325582 | 0.493885 | NA |
| Ilumatobacter           | 0.000040 | 0.000219 | 0.000000 | 0.000000 | 0.325582 | 0.493885 | NA |
| Fluviicola              | 0.000040 | 0.000219 | 0.000000 | 0.000000 | 0.325582 | 0.493885 | NA |
| Clostridium             | 0.000040 | 0.000219 | 0.000290 | 0.001331 | 0.402725 | 0.538677 | NA |
| Desulfovibrio           | 0.000033 | 0.000183 | 0.000000 | 0.000000 | 0.325582 | 0.493885 | NA |
| Novosphingobium         | 0.000030 | 0.000164 | 0.000048 | 0.000218 | 0.756087 | 0.820065 | NA |
| Actinobacteria_PeM15    | 0.000027 | 0.000146 | 0.000000 | 0.000000 | 0.325582 | 0.493885 | NA |
| Peptostreptococcales    | 0.000027 | 0.000146 | 0.000167 | 0.000764 | 0.416167 | 0.549654 | NA |
| Sulfurifustis           | 0.000020 | 0.000110 | 0.000000 | 0.000000 | 0.325582 | 0.493885 | NA |
| Limnohabitans           | 0.000020 | 0.000110 | 0.000000 | 0.000000 | 0.325582 | 0.493885 | NA |
| Sporichthyaceae_hgcl    | 0.000017 | 0.000091 | 0.000000 | 0.000000 | 0.325582 | 0.493885 | NA |
| Paracoccus              | 0.000017 | 0.000091 | 0.002014 | 0.009231 | 0.333193 | 0.496246 | NA |
| Anaerovoracaceae        | 0.000017 | 0.000091 | 0.000210 | 0.000960 | 0.369649 | 0.510700 | NA |
| Paenibacillus           | 0.000013 | 0.000073 | 0.000000 | 0.000000 | 0.325582 | 0.493885 | NA |
| Nannocystis             | 0.000013 | 0.000073 | 0.000000 | 0.000000 | 0.325582 | 0.493885 | NA |
| Rhodovastum             | 0.000013 | 0.000073 | 0.000000 | 0.000000 | 0.325582 | 0.493885 | NA |
| Pseudopropionibacterium | 0.000007 | 0.000037 | 0.000000 | 0.000000 | 0.325582 | 0.493885 | NA |
| Agreia                  | 0.000003 | 0.000018 | 0.000000 | 0.000000 | 0.325582 | 0.493885 | NA |
| Caulobacter             | 0.000003 | 0.000018 | 0.000076 | 0.000349 | 0.350770 | 0.498545 | NA |
| Ochrobactrum            | 0.000000 | 0.000000 | 0.000352 | 0.000923 | 0.095474 | 0.493885 | NA |
| Ensifer                 | 0.000000 | 0.000000 | 0.002633 | 0.007084 | 0.103947 | 0.493885 | NA |
| Brevundimonas           | 0.000000 | 0.000000 | 0.000967 | 0.002921 | 0.145009 | 0.493885 | NA |
| Desulfohalobium         | 0.000000 | 0.000000 | 0.000086 | 0.000271 | 0.162298 | 0.493885 | NA |
| Cutibacterium           | 0.000000 | 0.000000 | 0.000133 | 0.000426 | 0.166781 | 0.493885 | NA |
| Methylobacterium        | 0.000000 | 0.000000 | 0.001462 | 0.004672 | 0.167016 | 0.493885 | NA |
| Achromobacter           | 0.000000 | 0.000000 | 0.000610 | 0.001956 | 0.168770 | 0.493885 | NA |
| Parascardovia           | 0.000000 | 0.000000 | 0.000071 | 0.000231 | 0.171036 | 0.493885 | NA |
| Delftia                 | 0.000000 | 0.000000 | 0.000481 | 0.001570 | 0.175602 | 0.493885 | NA |
| Rhodococcus             | 0.000000 | 0.000000 | 0.001386 | 0.004558 | 0.178845 | 0.493885 | NA |
| Cellvibrio              | 0.000000 | 0.000000 | 0.000510 | 0.002097 | 0.278634 | 0.493885 | NA |
| Nocardioideae           | 0.000000 | 0.000000 | 0.000252 | 0.001134 | 0.319898 | 0.493885 | NA |
| Peptostreptococcaceae   | 0.000000 | 0.000000 | 0.000224 | 0.001026 | 0.329257 | 0.493885 | NA |
| Hydrogenophaga          | 0.000000 | 0.000000 | 0.000214 | 0.000982 | 0.329257 | 0.493885 | NA |
| Georgenia               | 0.000000 | 0.000000 | 0.001943 | 0.008903 | 0.329257 | 0.493885 | NA |
| Mycetocola              | 0.000000 | 0.000000 | 0.000219 | 0.001004 | 0.329257 | 0.493885 | NA |
| Kocuria                 | 0.000000 | 0.000000 | 0.000252 | 0.001157 | 0.329257 | 0.493885 | NA |
| Paeniglutamibacter      | 0.000000 | 0.000000 | 0.000081 | 0.000371 | 0.329257 | 0.493885 | NA |
| Actinoplanes            | 0.000000 | 0.000000 | 0.000348 | 0.001593 | 0.329257 | 0.493885 | NA |
| Mucilaginibacter        | 0.000000 | 0.000000 | 0.000062 | 0.000284 | 0.329257 | 0.493885 | NA |
| Pedobacter              | 0.000000 | 0.000000 | 0.000190 | 0.000873 | 0.329257 | 0.493885 | NA |
| Oligoflexus             | 0.000000 | 0.000000 | 0.000010 | 0.000044 | 0.329257 | 0.493885 | NA |
| Arcobacter              | 0.000000 | 0.000000 | 0.000029 | 0.000131 | 0.329257 | 0.493885 | NA |
| Pseudarcobacter         | 0.000000 | 0.000000 | 0.000052 | 0.000240 | 0.329257 | 0.493885 | NA |
| Tychonema               | 0.000000 | 0.000000 | 0.000033 | 0.000153 | 0.329257 | 0.493885 | NA |
| Anoxybacillus           | 0.000000 | 0.000000 | 0.000086 | 0.000393 | 0.329257 | 0.493885 | NA |
| Planomicrobium          | 0.000000 | 0.000000 | 0.000048 | 0.000218 | 0.329257 | 0.493885 | NA |
| Psychrobacillus         | 0.000000 | 0.000000 | 0.000586 | 0.002684 | 0.329257 | 0.493885 | NA |
| Sporosarcina            | 0.000000 | 0.000000 | 0.000276 | 0.001266 | 0.329257 | 0.493885 | NA |
| Bulleidia               | 0.000000 | 0.000000 | 0.000200 | 0.000917 | 0.329257 | 0.493885 | NA |
| Facklamia               | 0.000000 | 0.000000 | 0.000143 | 0.000655 | 0.329257 | 0.493885 | NA |
| Leuconostoc             | 0.000000 | 0.000000 | 0.000276 | 0.001266 | 0.329257 | 0.493885 | NA |
| Jeotgalicoccus          | 0.000000 | 0.000000 | 0.000071 | 0.000327 | 0.329257 | 0.493885 | NA |
| Ruminiclostridium       | 0.000000 | 0.000000 | 0.000181 | 0.000829 | 0.329257 | 0.493885 | NA |
| Proteiniclasticum       | 0.000000 | 0.000000 | 0.000014 | 0.000065 | 0.329257 | 0.493885 | NA |
| Eubacterium             | 0.000000 | 0.000000 | 0.000033 | 0.000153 | 0.329257 | 0.493885 | NA |
| Eubacterium             | 0.000000 | 0.000000 | 0.000014 | 0.000065 | 0.329257 | 0.493885 | NA |
| Dorea                   | 0.000000 | 0.000000 | 0.000019 | 0.000087 | 0.329257 | 0.493885 | NA |
| Azospirillum            | 0.000000 | 0.000000 | 0.000090 | 0.000415 | 0.329257 | 0.493885 | NA |
| Bosea                   | 0.000000 | 0.000000 | 0.000162 | 0.000742 | 0.329257 | 0.493885 | NA |
| Devosia                 | 0.000000 | 0.000000 | 0.000257 | 0.001178 | 0.329257 | 0.493885 | NA |
| Sphingobium             | 0.000000 | 0.000000 | 0.000081 | 0.000371 | 0.329257 | 0.493885 | NA |
| Alcaligenes             | 0.000000 | 0.000000 | 0.000076 | 0.000349 | 0.329257 | 0.493885 | NA |
| Cupriavidus             | 0.000000 | 0.000000 | 0.000095 | 0.000436 | 0.329257 | 0.493885 | NA |
| Ottowia                 | 0.000000 | 0.000000 | 0.000033 | 0.000153 | 0.329257 | 0.493885 | NA |

|                         |          |          |          |          |          |          |    |
|-------------------------|----------|----------|----------|----------|----------|----------|----|
| Polaromonas             | 0.000000 | 0.000000 | 0.001186 | 0.005434 | 0.329257 | 0.493885 | NA |
| Variovorax              | 0.000000 | 0.000000 | 0.000457 | 0.002095 | 0.329257 | 0.493885 | NA |
| Methylotenera           | 0.000000 | 0.000000 | 0.000033 | 0.000153 | 0.329257 | 0.493885 | NA |
| Duganella               | 0.000000 | 0.000000 | 0.000981 | 0.004495 | 0.329257 | 0.493885 | NA |
| Janthinobacterium       | 0.000000 | 0.000000 | 0.000776 | 0.003557 | 0.329257 | 0.493885 | NA |
| Massilia                | 0.000000 | 0.000000 | 0.001410 | 0.006459 | 0.329257 | 0.493885 | NA |
| Rhodocyclaceae_C39      | 0.000000 | 0.000000 | 0.000210 | 0.000960 | 0.329257 | 0.493885 | NA |
| Dechlorosoma            | 0.000000 | 0.000000 | 0.000010 | 0.000044 | 0.329257 | 0.493885 | NA |
| Rickettsiella           | 0.000000 | 0.000000 | 0.000052 | 0.000240 | 0.329257 | 0.493885 | NA |
| Escherichia             | 0.000000 | 0.000000 | 0.000062 | 0.000284 | 0.329257 | 0.493885 | NA |
| Alkanindiges            | 0.000000 | 0.000000 | 0.000095 | 0.000436 | 0.329257 | 0.493885 | NA |
| Photobacterium          | 0.000000 | 0.000000 | 0.001510 | 0.006918 | 0.329257 | 0.493885 | NA |
| Xanthomonas             | 0.000000 | 0.000000 | 0.000071 | 0.000327 | 0.329257 | 0.493885 | NA |
| Lacunisphaera           | 0.000000 | 0.000000 | 0.000029 | 0.000131 | 0.329257 | 0.493885 | NA |
| Pedospaeraceae_ADurb    | 0.000000 | 0.000000 | 0.000019 | 0.000087 | 0.329257 | 0.493885 | NA |
| Pedospaeraceae_Ellin516 | 0.000000 | 0.000000 | 0.000033 | 0.000153 | 0.329257 | 0.493885 | NA |

**Supplementary table 3: Relative abundance at species level (no postprocessing)**

| Species                           | CKD patients |          | healthy mothers<br>(control group) |          | P-value | FDR   |
|-----------------------------------|--------------|----------|------------------------------------|----------|---------|-------|
|                                   | mean %       | sd %     | mean %                             | sd %     |         |       |
| Haemophilus_influenzae            | 0.037220     | 0.049822 | 0.002267                           | 0.006608 | 0.001   | 0.126 |
| Neisseria_elongata                | 0.016397     | 0.022107 | 0.001348                           | 0.002943 | 0.001   | 0.126 |
| Streptococcus_parasanguinis       | 1.130590     | 0.776606 | 2.612252                           | 1.856762 | 0.002   | 0.155 |
| Haemophilus_haemolyticus          | 0.044867     | 0.067347 | 0.003333                           | 0.007527 | 0.002   | 0.155 |
| Haemophilus_pittmaniae            | 0.621480     | 0.663394 | 0.218210                           | 0.263688 | 0.005   | 0.247 |
| Shewanella_putrefaciens           | 0.003603     | 0.006541 | 0.000000                           | 0.000000 | 0.005   | 0.247 |
| Neisseria_meningitidis            | 7.134403     | 5.408059 | 3.616286                           | 3.475141 | 0.007   | 0.275 |
| Granulicatella_adiacens           | 0.009553     | 0.017915 | 0.000581                           | 0.002303 | 0.011   | 0.365 |
| Aggregatibacter_aphrophilus       | 0.050540     | 0.075755 | 0.010967                           | 0.028556 | 0.013   | 0.365 |
| Haemophilus_parahemolyticus       | 0.014610     | 0.028867 | 0.000619                           | 0.001863 | 0.013   | 0.365 |
| Prevotellaceae_bacterium          | 0.528050     | 0.834714 | 0.121076                           | 0.200068 | 0.015   | 0.381 |
| Prevotella_loescheii              | 0.152497     | 0.279802 | 0.024562                           | 0.044482 | 0.020   | 0.462 |
| Gemella_morbilorum                | 0.015363     | 0.022632 | 0.004343                           | 0.009795 | 0.022   | 0.484 |
| SR1_bacterium                     | 0.009137     | 0.021043 | 0.000105                           | 0.000480 | 0.026   | 0.484 |
| Actinobacillus_pleuropneumoniae   | 0.016290     | 0.035375 | 0.001167                           | 0.003562 | 0.027   | 0.484 |
| Lactobacillus_plantarum           | 0.009100     | 0.021565 | 0.000000                           | 0.000000 | 0.028   | 0.484 |
| Bacteroidaceae_bacterium          | 0.012283     | 0.029649 | 0.000000                           | 0.000000 | 0.031   | 0.484 |
| Streptococcus_infantis            | 0.030300     | 0.036822 | 0.013376                           | 0.017531 | 0.034   | 0.484 |
| Mannheimia_haemolytica            | 0.012367     | 0.024395 | 0.002119                           | 0.006358 | 0.035   | 0.484 |
| Porphyromonas_catoniae            | 0.017423     | 0.038100 | 0.002162                           | 0.004014 | 0.038   | 0.484 |
| Prevotella_shahii                 | 0.051737     | 0.117645 | 0.005410                           | 0.012341 | 0.041   | 0.484 |
| Veillonella_rogosae               | 0.070573     | 0.183813 | 0.000000                           | 0.000000 | 0.044   | 0.484 |
| Prevotella_pallens                | 0.246143     | 0.263320 | 0.487671                           | 0.491020 | 0.049   | 0.484 |
| Shewanella_baltica                | 0.000610     | 0.001655 | 0.000000                           | 0.000000 | 0.053   | 0.484 |
| Campylobacter_showae              | 0.000903     | 0.002218 | 0.000076                           | 0.000349 | 0.054   | 0.484 |
| Haemophilus_parafluorae           | 1.179723     | 1.189627 | 0.667086                           | 0.653983 | 0.054   | 0.484 |
| Granulicatella_elegans            | 0.020783     | 0.027338 | 0.008548                           | 0.018039 | 0.060   | 0.484 |
| Actinomyces_naeslundii            | 0.047543     | 0.096821 | 0.012305                           | 0.019964 | 0.062   | 0.484 |
| Corynebacterium_durum             | 0.018823     | 0.041871 | 0.003748                           | 0.008965 | 0.065   | 0.484 |
| Hafnia_psychrotolerans            | 0.000817     | 0.002357 | 0.000000                           | 0.000000 | 0.068   | 0.484 |
| Capnocytophaga_sputigena          | 0.114820     | 0.270403 | 0.018510                           | 0.058451 | 0.068   | 0.484 |
| Leptotrichia_goodfellowii         | 0.001093     | 0.004833 | 0.031076                           | 0.073028 | 0.075   | 0.484 |
| Aggregatibacter_segnis            | 0.019503     | 0.028229 | 0.008500                           | 0.014969 | 0.078   | 0.484 |
| Acinetobacter_johnsonii           | 0.000320     | 0.001247 | 0.001671                           | 0.003245 | 0.082   | 0.484 |
| Clostridiales_bacterium           | 0.321353     | 0.492953 | 0.142271                           | 0.211687 | 0.084   | 0.484 |
| Ochrobactrum_intermedium          | 0.000000     | 0.000000 | 0.000271                           | 0.000686 | 0.085   | 0.484 |
| Aerococcaceae_bacterium           | 0.002493     | 0.006749 | 0.000371                           | 0.000999 | 0.100   | 0.484 |
| Treponema_medium                  | 0.002360     | 0.005960 | 0.000462                           | 0.001261 | 0.100   | 0.484 |
| Candidatus_Saccharibacteria       | 0.102557     | 0.208616 | 0.217567                           | 0.262359 | 0.103   | 0.484 |
| Lactobacillus_sakei               | 0.002283     | 0.008771 | 0.010786                           | 0.021865 | 0.104   | 0.484 |
| Gracilibacteria_bacterium         | 0.000227     | 0.000719 | 0.000010                           | 0.000044 | 0.110   | 0.484 |
| Simonsiella_muelleri              | 0.004607     | 0.013088 | 0.000671                           | 0.002370 | 0.117   | 0.484 |
| Megasphaera_micronuciformis       | 0.260760     | 0.497249 | 0.529181                           | 0.644546 | 0.118   | 0.484 |
| Prevotella_aurantiaca             | 0.110830     | 0.379994 | 0.000000                           | 0.000000 | 0.121   | 0.484 |
| Lachnospiraceae_bacterium         | 0.008267     | 0.021512 | 0.001867                           | 0.004100 | 0.122   | 0.484 |
| Capnocytophaga_gingivalis         | 0.047393     | 0.077748 | 0.018481                           | 0.055347 | 0.127   | 0.484 |
| Prevotella_histicola              | 0.223267     | 0.425438 | 0.560343                           | 0.923152 | 0.131   | 0.484 |
| Chryseobacterium_reticulitermitis | 0.000423     | 0.001176 | 0.000076                           | 0.000349 | 0.136   | 0.484 |
| Selenomonas_noxia                 | 0.009640     | 0.022064 | 0.030024                           | 0.060111 | 0.151   | 0.484 |
| Corynebacterium_matruchotii       | 0.008117     | 0.021918 | 0.001881                           | 0.006919 | 0.153   | 0.484 |
| Fusobacterium_periodonticum       | 1.149917     | 0.992334 | 0.772124                           | 0.862169 | 0.155   | 0.484 |
| Catonella_morbi                   | 0.045310     | 0.062904 | 0.025957                           | 0.031895 | 0.156   | 0.484 |

|                                       |          |          |          |          |       |       |
|---------------------------------------|----------|----------|----------|----------|-------|-------|
| TM7_phylum                            | 0.164733 | 0.262831 | 0.320114 | 0.442492 | 0.160 | 0.484 |
| [Haemophilus]_ducreyi                 | 0.004477 | 0.015659 | 0.000352 | 0.001442 | 0.162 | 0.484 |
| Selenomonas_infelix                   | 0.005130 | 0.019386 | 0.000062 | 0.000284 | 0.163 | 0.484 |
| Porphyromonas_asaccharolytica         | 0.000067 | 0.000255 | 0.000000 | 0.000000 | 0.163 | 0.484 |
| Brachymonas_denitrificans             | 0.005857 | 0.021772 | 0.000205 | 0.000617 | 0.166 | 0.484 |
| Scardovia_wiggisiae                   | 0.000040 | 0.000154 | 0.000000 | 0.000000 | 0.167 | 0.484 |
| Prevotella_denticola                  | 0.001880 | 0.007518 | 0.010433 | 0.026730 | 0.167 | 0.484 |
| Oribacterium_sinus                    | 0.000000 | 0.000000 | 0.002171 | 0.006979 | 0.169 | 0.484 |
| Parascardovia_denticolens             | 0.000000 | 0.000000 | 0.000071 | 0.000231 | 0.171 | 0.484 |
| Prevotella_oryzae                     | 0.000000 | 0.000000 | 0.001433 | 0.004629 | 0.171 | 0.484 |
| [Eubacterium]_minutum                 | 0.000000 | 0.000000 | 0.001205 | 0.003925 | 0.175 | 0.484 |
| Clostridiales_bacterium               | 0.000433 | 0.001523 | 0.000043 | 0.000196 | 0.175 | 0.484 |
| Delftia_acidovorans                   | 0.000000 | 0.000000 | 0.000481 | 0.001570 | 0.176 | 0.484 |
| Massiliprevotella_massiliensis        | 0.000093 | 0.000370 | 0.000000 | 0.000000 | 0.178 | 0.484 |
| Streptococcus_mutans                  | 0.000097 | 0.000309 | 0.003790 | 0.012226 | 0.182 | 0.484 |
| Alloscardovia_omnicolens              | 0.000477 | 0.002518 | 0.044952 | 0.148683 | 0.186 | 0.484 |
| Pasteurellaceae_bacterium             | 0.003103 | 0.008959 | 0.000705 | 0.003230 | 0.186 | 0.484 |
| Serratia_fonticola                    | 0.000103 | 0.000419 | 0.000000 | 0.000000 | 0.187 | 0.484 |
| Treponema_lecithinolyticum            | 0.000000 | 0.000000 | 0.000105 | 0.000354 | 0.190 | 0.484 |
| Lautropia_mirabilis                   | 0.060640 | 0.156413 | 0.020038 | 0.048473 | 0.191 | 0.484 |
| Actinomyces_oris                      | 0.003950 | 0.010268 | 0.001310 | 0.003003 | 0.192 | 0.484 |
| Peptoanaerobacter_stomatis            | 0.000383 | 0.001574 | 0.000000 | 0.000000 | 0.193 | 0.484 |
| Synergistales_bacterium               | 0.000267 | 0.001131 | 0.001071 | 0.002608 | 0.196 | 0.484 |
| Parvimonas_micra                      | 0.001397 | 0.002315 | 0.000648 | 0.001803 | 0.201 | 0.484 |
| Selenomonas_massiliensis              | 0.004733 | 0.014628 | 0.035481 | 0.106281 | 0.202 | 0.484 |
| Streptococcus_sobrinus                | 0.000000 | 0.000000 | 0.000938 | 0.003303 | 0.208 | 0.484 |
| Actinomyces_lingnae                   | 0.000480 | 0.002057 | 0.000000 | 0.000000 | 0.211 | 0.484 |
| Porphyromonas_gingivalis              | 0.000803 | 0.004091 | 0.007552 | 0.024178 | 0.219 | 0.484 |
| Lancefieldella_parvula                | 0.021207 | 0.043661 | 0.036433 | 0.042793 | 0.222 | 0.484 |
| Firmicutes_oral                       | 0.000747 | 0.002568 | 0.000148 | 0.000487 | 0.222 | 0.484 |
| Aggregatibacter_actinomycetemcomitans | 0.000000 | 0.000000 | 0.001371 | 0.004984 | 0.222 | 0.484 |
| Prevotella_fusca                      | 0.007747 | 0.024297 | 0.045424 | 0.136135 | 0.224 | 0.484 |
| Firmicutes_oral                       | 0.001267 | 0.004872 | 0.005114 | 0.014021 | 0.239 | 0.484 |
| Streptococcus_mitis                   | 0.012833 | 0.043008 | 0.003219 | 0.007847 | 0.240 | 0.484 |
| Pasteurella_multocida                 | 0.572577 | 0.788315 | 0.348310 | 0.572464 | 0.245 | 0.484 |
| Bacteroidetes_oral                    | 0.000673 | 0.002457 | 0.002462 | 0.006569 | 0.245 | 0.484 |
| Prevotella_dentalis                   | 0.001053 | 0.004910 | 0.000000 | 0.000000 | 0.250 | 0.484 |
| Fillifactor_alocis                    | 0.010290 | 0.027939 | 0.003805 | 0.010133 | 0.251 | 0.484 |
| Capnocytophaga_leadbetteri            | 0.138683 | 0.416682 | 0.046310 | 0.108467 | 0.254 | 0.484 |
| Schaalia_odontolytica                 | 0.196740 | 0.260163 | 0.303395 | 0.361738 | 0.255 | 0.484 |
| Rothia_aeria                          | 0.095340 | 0.111953 | 0.162948 | 0.249863 | 0.256 | 0.484 |
| Prevotella_oralis                     | 0.000013 | 0.000073 | 0.000214 | 0.000800 | 0.265 | 0.484 |
| Staphylococcus_epidermidis            | 0.000000 | 0.000000 | 0.000714 | 0.002868 | 0.267 | 0.484 |
| Streptococcus_suis                    | 0.461487 | 1.118768 | 0.223305 | 0.248364 | 0.268 | 0.484 |
| Lactococcus_lactis                    | 0.006810 | 0.033349 | 0.000057 | 0.000262 | 0.277 | 0.484 |
| Scardovia_inopinata                   | 0.000233 | 0.001153 | 0.000000 | 0.000000 | 0.277 | 0.484 |
| Eubacterium_sulci                     | 0.000627 | 0.003432 | 0.004052 | 0.013839 | 0.279 | 0.484 |
| Catonella_genomosp.                   | 0.000763 | 0.003172 | 0.000119 | 0.000376 | 0.279 | 0.484 |
| Veillonella_atypica                   | 1.103863 | 1.593069 | 1.668486 | 1.945413 | 0.280 | 0.484 |
| Lactobacillus_crispatus               | 0.000260 | 0.001298 | 0.000000 | 0.000000 | 0.282 | 0.484 |
| Porphyromonas_endodontalis            | 0.018637 | 0.038559 | 0.009190 | 0.024227 | 0.289 | 0.484 |
| Streptococcus_pneumoniae              | 0.483760 | 0.667648 | 0.333914 | 0.316230 | 0.291 | 0.484 |
| [Eubacterium]_yurii                   | 0.024457 | 0.083456 | 0.007605 | 0.020010 | 0.295 | 0.484 |
| Leptotrichia_wadei                    | 0.230100 | 0.413233 | 0.433419 | 0.818200 | 0.303 | 0.484 |
| Dialister_micraerophilus              | 0.000193 | 0.001059 | 0.002086 | 0.008173 | 0.304 | 0.484 |
| Stomatobaculum_longum                 | 0.087607 | 0.123042 | 0.125038 | 0.135481 | 0.319 | 0.484 |
| Staphylococcus_aureus                 | 0.016130 | 0.087445 | 0.000000 | 0.000000 | 0.321 | 0.484 |
| Neisseria_perflava                    | 0.001857 | 0.003552 | 0.018119 | 0.073149 | 0.321 | 0.484 |
| Flavobacteriaceae_bacterium           | 0.000613 | 0.002867 | 0.000081 | 0.000371 | 0.323 | 0.484 |
| Gemella_haemolysins                   | 1.348007 | 1.304639 | 1.878419 | 2.158505 | 0.323 | 0.484 |
| Veillonella_parvula                   | 3.256923 | 3.340880 | 2.453671 | 2.406158 | 0.323 | 0.484 |
| Prevotella_jejuni                     | 0.151970 | 0.499842 | 0.284729 | 0.444681 | 0.324 | 0.484 |
| Prevotella_multiformis                | 0.000177 | 0.000968 | 0.000000 | 0.000000 | 0.326 | 0.484 |
| Ilumatobacter_nonamiensis             | 0.000040 | 0.000219 | 0.000000 | 0.000000 | 0.326 | 0.484 |
| Arcanobacterium_phocae                | 0.003320 | 0.018184 | 0.000000 | 0.000000 | 0.326 | 0.484 |
| Candidatus_Planktophila               | 0.000017 | 0.000091 | 0.000000 | 0.000000 | 0.326 | 0.484 |
| Pseudopropionibacterium_propionicum   | 0.000007 | 0.000037 | 0.000000 | 0.000000 | 0.326 | 0.484 |
| Prevotella_zoogloeiformans            | 0.000087 | 0.000475 | 0.000000 | 0.000000 | 0.326 | 0.484 |
| Phocaecicola_abscessus                | 0.000047 | 0.000256 | 0.000000 | 0.000000 | 0.326 | 0.484 |
| Prevotella_maculosa                   | 0.000107 | 0.000584 | 0.000000 | 0.000000 | 0.326 | 0.484 |
| Prevotella_saccharolytica             | 0.000023 | 0.000128 | 0.000000 | 0.000000 | 0.326 | 0.484 |
| unidentified_eubacterium              | 0.000240 | 0.001315 | 0.000000 | 0.000000 | 0.326 | 0.484 |
| Campylobacter_rectus                  | 0.000027 | 0.000146 | 0.000000 | 0.000000 | 0.326 | 0.484 |
| Arachis_hypogaea                      | 0.000320 | 0.001753 | 0.000000 | 0.000000 | 0.326 | 0.484 |
| Desulfovibrio_fairfieldensis          | 0.000033 | 0.000183 | 0.000000 | 0.000000 | 0.326 | 0.484 |
| Alkalibacterium_olivapovliticus       | 0.000077 | 0.000420 | 0.000000 | 0.000000 | 0.326 | 0.484 |

|                                 |          |          |          |          |       |       |
|---------------------------------|----------|----------|----------|----------|-------|-------|
| Lactobacillus_curvatus          | 0.000660 | 0.003615 | 0.000000 | 0.000000 | 0.326 | 0.484 |
| Lactobacillus_gasseri           | 0.000020 | 0.000110 | 0.000000 | 0.000000 | 0.326 | 0.484 |
| Paenibacillus_turicensis        | 0.000013 | 0.000073 | 0.000000 | 0.000000 | 0.326 | 0.484 |
| Moryella_indoligenes            | 0.000310 | 0.001698 | 0.000000 | 0.000000 | 0.326 | 0.484 |
| Oceanivirga_salmonicida         | 0.000167 | 0.000913 | 0.000000 | 0.000000 | 0.326 | 0.484 |
| Acetobacteraceae_bacterium      | 0.000013 | 0.000073 | 0.000000 | 0.000000 | 0.326 | 0.484 |
| Paraburkholderia_kururiensis    | 0.000247 | 0.001351 | 0.000000 | 0.000000 | 0.326 | 0.484 |
| Eogystia_hippohaecolus          | 0.000040 | 0.000219 | 0.000000 | 0.000000 | 0.326 | 0.484 |
| Moraxella_osloensis             | 0.000127 | 0.000694 | 0.000000 | 0.000000 | 0.326 | 0.484 |
| Pseudomonas_fluorescens         | 0.000030 | 0.000164 | 0.000000 | 0.000000 | 0.326 | 0.484 |
| Pseudomonas_mendocina           | 0.000010 | 0.000055 | 0.000000 | 0.000000 | 0.326 | 0.484 |
| Vibrio_litoralis                | 0.000010 | 0.000055 | 0.000000 | 0.000000 | 0.326 | 0.484 |
| Treponema_maltophilum           | 0.000063 | 0.000347 | 0.000000 | 0.000000 | 0.326 | 0.484 |
| Treponema_socranskii            | 0.000010 | 0.000055 | 0.000000 | 0.000000 | 0.326 | 0.484 |
| bacterium_enrichment            | 0.000147 | 0.000803 | 0.000000 | 0.000000 | 0.326 | 0.484 |
| Dialister_invisus               | 0.148917 | 0.735108 | 0.014652 | 0.039387 | 0.326 | 0.484 |
| Lactobacillus_algidus           | 0.000000 | 0.000000 | 0.000433 | 0.001986 | 0.329 | 0.484 |
| Bifidobacterium_aquikefiri      | 0.000000 | 0.000000 | 0.000567 | 0.002597 | 0.329 | 0.484 |
| Rhodococcus_erythropolis        | 0.000000 | 0.000000 | 0.000381 | 0.001746 | 0.329 | 0.484 |
| Kocuria_palustris               | 0.000000 | 0.000000 | 0.000252 | 0.001157 | 0.329 | 0.484 |
| Prevotella_heparinolytica       | 0.000000 | 0.000000 | 0.000052 | 0.000240 | 0.329 | 0.484 |
| Prevotella_genomosp.            | 0.000000 | 0.000000 | 0.000195 | 0.000895 | 0.329 | 0.484 |
| Prevotella_micans               | 0.000000 | 0.000000 | 0.000100 | 0.000458 | 0.329 | 0.484 |
| Bacteroidia_bacterium           | 0.000000 | 0.000000 | 0.000014 | 0.000065 | 0.329 | 0.484 |
| Flavobacterium_aquatile         | 0.000000 | 0.000000 | 0.000095 | 0.000436 | 0.329 | 0.484 |
| Thymallus_thymallus             | 0.000000 | 0.000000 | 0.000010 | 0.000044 | 0.329 | 0.484 |
| Campylobacter_gracilis          | 0.000000 | 0.000000 | 0.000043 | 0.000196 | 0.329 | 0.484 |
| Synura_petersenii               | 0.000000 | 0.000000 | 0.000019 | 0.000087 | 0.329 | 0.484 |
| Anoxybacillus_flavithermus      | 0.000000 | 0.000000 | 0.000086 | 0.000393 | 0.329 | 0.484 |
| Bulleidia_extracta              | 0.000000 | 0.000000 | 0.000200 | 0.000917 | 0.329 | 0.484 |
| Facklamia_languida              | 0.000000 | 0.000000 | 0.000143 | 0.000655 | 0.329 | 0.484 |
| Carnobacterium_inhibens         | 0.000000 | 0.000000 | 0.000029 | 0.000131 | 0.329 | 0.484 |
| Enterococcus_italicus           | 0.000000 | 0.000000 | 0.000962 | 0.004408 | 0.329 | 0.484 |
| Lactobacillus_delbrueckii       | 0.000000 | 0.000000 | 0.001881 | 0.008620 | 0.329 | 0.484 |
| Lactobacillus_kalixensis        | 0.000000 | 0.000000 | 0.000052 | 0.000240 | 0.329 | 0.484 |
| Lactobacillus_salivarius        | 0.000000 | 0.000000 | 0.000852 | 0.003906 | 0.329 | 0.484 |
| Leuconostoc_carnosum            | 0.000000 | 0.000000 | 0.000243 | 0.001113 | 0.329 | 0.484 |
| Streptococcus_downei            | 0.000000 | 0.000000 | 0.000029 | 0.000131 | 0.329 | 0.484 |
| Staphylococcus_capitis          | 0.000000 | 0.000000 | 0.000048 | 0.000218 | 0.329 | 0.484 |
| Staphylococcus_hominis          | 0.000000 | 0.000000 | 0.000133 | 0.000611 | 0.329 | 0.484 |
| iron-reducing_bacterium         | 0.000000 | 0.000000 | 0.000181 | 0.000829 | 0.329 | 0.484 |
| Butyrivibrio_proteoclasticus    | 0.000000 | 0.000000 | 0.001110 | 0.005084 | 0.329 | 0.484 |
| Dorea_formicigenerans           | 0.000000 | 0.000000 | 0.000019 | 0.000087 | 0.329 | 0.484 |
| human_gut                       | 0.000000 | 0.000000 | 0.000014 | 0.000065 | 0.329 | 0.484 |
| [Eubacterium]_nodatum           | 0.000000 | 0.000000 | 0.000033 | 0.000153 | 0.329 | 0.484 |
| Selenomonas_artemidis           | 0.000000 | 0.000000 | 0.000033 | 0.000153 | 0.329 | 0.484 |
| Veillonella_denticariosi        | 0.000000 | 0.000000 | 0.000371 | 0.001702 | 0.329 | 0.484 |
| Paracoccus_yeei                 | 0.000000 | 0.000000 | 0.000029 | 0.000131 | 0.329 | 0.484 |
| Alcaligenes_faecalis            | 0.000000 | 0.000000 | 0.000076 | 0.000349 | 0.329 | 0.484 |
| Comamonas_aquatica              | 0.000000 | 0.000000 | 0.000090 | 0.000415 | 0.329 | 0.484 |
| Ottowia_oryzae                  | 0.000000 | 0.000000 | 0.000033 | 0.000153 | 0.329 | 0.484 |
| Methylotenera_versatilis        | 0.000000 | 0.000000 | 0.000033 | 0.000153 | 0.329 | 0.484 |
| Rhodocyclaceae_bacterium        | 0.000000 | 0.000000 | 0.000210 | 0.000960 | 0.329 | 0.484 |
| Cellvibrio_diazotrophicus       | 0.000000 | 0.000000 | 0.000233 | 0.001069 | 0.329 | 0.484 |
| Cellvibrio_gandavensis          | 0.000000 | 0.000000 | 0.000167 | 0.000764 | 0.329 | 0.484 |
| Proasellus_assaforensis         | 0.000000 | 0.000000 | 0.000052 | 0.000240 | 0.329 | 0.484 |
| Escherichia_coli                | 0.000000 | 0.000000 | 0.000062 | 0.000284 | 0.329 | 0.484 |
| Serratia_plymuthica             | 0.000000 | 0.000000 | 0.007186 | 0.032929 | 0.329 | 0.484 |
| Acinetobacter_baumannii         | 0.000000 | 0.000000 | 0.000033 | 0.000153 | 0.329 | 0.484 |
| Pseudomonas_caeni               | 0.000000 | 0.000000 | 0.000833 | 0.003819 | 0.329 | 0.484 |
| Pseudomonas_syringae            | 0.000000 | 0.000000 | 0.000195 | 0.000895 | 0.329 | 0.484 |
| Synergistetes_bacterium         | 0.000000 | 0.000000 | 0.000043 | 0.000196 | 0.329 | 0.484 |
| bacterium_Ellin516              | 0.000000 | 0.000000 | 0.000033 | 0.000153 | 0.329 | 0.484 |
| Prevotella_oulorum              | 0.028217 | 0.059667 | 0.063881 | 0.157806 | 0.333 | 0.484 |
| TM7_bacterium                   | 0.007727 | 0.017706 | 0.004143 | 0.008025 | 0.335 | 0.484 |
| Lactobacillus_acidophilus       | 0.000003 | 0.000018 | 0.000229 | 0.001047 | 0.336 | 0.484 |
| Treponema_denticola             | 0.000270 | 0.001405 | 0.000962 | 0.003039 | 0.340 | 0.484 |
| Prevotella_nanceiensis          | 0.399763 | 0.644789 | 0.254624 | 0.429936 | 0.340 | 0.484 |
| Lactobacillus_reuteri           | 0.000440 | 0.002372 | 0.014843 | 0.067471 | 0.340 | 0.484 |
| Prevotella_buccae               | 0.000670 | 0.003267 | 0.000086 | 0.000393 | 0.340 | 0.484 |
| Lactobacillus_vaginalis         | 0.000087 | 0.000475 | 0.003167 | 0.014511 | 0.343 | 0.485 |
| candidate_division              | 0.003547 | 0.015164 | 0.000852 | 0.002519 | 0.347 | 0.489 |
| Corynebacterium_argentoratense  | 0.000393 | 0.002154 | 0.009510 | 0.043578 | 0.350 | 0.490 |
| Bifidobacterium_longum          | 0.003297 | 0.017720 | 0.043048 | 0.190522 | 0.352 | 0.491 |
| Peptostreptococcaceae_bacterium | 0.003837 | 0.020864 | 0.000252 | 0.001157 | 0.355 | 0.494 |
| Lactobacillus_fermentum         | 0.001090 | 0.005970 | 0.018381 | 0.084232 | 0.359 | 0.496 |



|                               |          |          |           |           |       |       |
|-------------------------------|----------|----------|-----------|-----------|-------|-------|
| Eubacterium_saphenum          | 0.000017 | 0.000091 | 0.000210  | 0.000960  | 0.370 | 0.508 |
| Lactobacillus_helveticus      | 0.001537 | 0.008417 | 0.016733  | 0.076134  | 0.373 | 0.511 |
| TM7_phylum                    | 0.180180 | 0.288289 | 0.262290  | 0.351335  | 0.383 | 0.521 |
| Mobiluncus_curtisii           | 0.000120 | 0.000657 | 0.000705  | 0.002964  | 0.384 | 0.521 |
| Johnsonella_ignava            | 0.000113 | 0.000584 | 0.000019  | 0.000087  | 0.391 | 0.527 |
| Shuttleworthia_satelles       | 0.000413 | 0.002264 | 0.001176  | 0.003629  | 0.400 | 0.537 |
| Capnocytophaga_granulosa      | 0.002577 | 0.005922 | 0.001381  | 0.004207  | 0.403 | 0.539 |
| Corynebacterium_diphtheriae   | 0.004487 | 0.010887 | 0.022562  | 0.099777  | 0.418 | 0.555 |
| TM7_phylum                    | 0.002090 | 0.009772 | 0.000595  | 0.001895  | 0.420 | 0.555 |
| TM7_phylum                    | 0.071310 | 0.111738 | 0.110252  | 0.199938  | 0.425 | 0.555 |
| Firmicutes_oral               | 0.000063 | 0.000268 | 0.000352  | 0.001615  | 0.426 | 0.555 |
| Lactobacillus_amylovorus      | 0.000520 | 0.002848 | 0.002938  | 0.013464  | 0.427 | 0.555 |
| Lachnobacterium_bovis         | 0.001063 | 0.005824 | 0.000195  | 0.000895  | 0.428 | 0.555 |
| Candidatus_Saccharibacteria   | 0.001040 | 0.003821 | 0.002276  | 0.006309  | 0.429 | 0.555 |
| Haemophilus_sputorum          | 0.023457 | 0.040435 | 0.070248  | 0.265483  | 0.432 | 0.556 |
| Lachnospiraceae_bacterium     | 0.003527 | 0.008655 | 0.002129  | 0.004008  | 0.443 | 0.566 |
| Leptotrichia_shahii           | 0.018703 | 0.052895 | 0.038590  | 0.108573  | 0.444 | 0.566 |
| Dialister_pneumosintes        | 0.001790 | 0.006813 | 0.003729  | 0.010017  | 0.446 | 0.567 |
| Neisseria_oralis              | 0.008497 | 0.023947 | 0.016848  | 0.045879  | 0.451 | 0.570 |
| Megasphaera_elsdenii          | 0.000057 | 0.000310 | 0.000219  | 0.001004  | 0.480 | 0.605 |
| Campylobacter_concisus        | 0.027087 | 0.028504 | 0.021633  | 0.027375  | 0.495 | 0.618 |
| Alloprevotella_tannerae       | 0.088927 | 0.284350 | 0.050419  | 0.094866  | 0.495 | 0.618 |
| Prevotella_pleuritidis        | 0.006747 | 0.022648 | 0.003567  | 0.009849  | 0.499 | 0.619 |
| Prevotella_salivae            | 0.535690 | 0.706516 | 0.751957  | 1.326631  | 0.501 | 0.619 |
| Streptococcus_oralis          | 0.005743 | 0.011762 | 0.008019  | 0.012613  | 0.518 | 0.638 |
| Snodgrassella_alvi            | 0.000207 | 0.001132 | 0.000067  | 0.000306  | 0.523 | 0.642 |
| Lactobacillus_iners           | 0.000363 | 0.001990 | 0.000124  | 0.000396  | 0.526 | 0.642 |
| Tannerella_forsythia          | 0.012717 | 0.032121 | 0.008062  | 0.020495  | 0.531 | 0.643 |
| Eikenella_corrodens           | 0.000123 | 0.000604 | 0.000048  | 0.000218  | 0.532 | 0.643 |
| Streptococcus_australis       | 0.010840 | 0.029973 | 0.006714  | 0.016896  | 0.535 | 0.643 |
| Streptococcus_gordonii        | 0.034577 | 0.042083 | 0.027752  | 0.035642  | 0.536 | 0.643 |
| Lachnoanaerobaculum_umeaense  | 0.261820 | 0.440938 | 0.520000  | 1.904735  | 0.548 | 0.653 |
| Treponema_refringens          | 0.000013 | 0.000073 | 0.000005  | 0.000022  | 0.549 | 0.653 |
| Gemella_sanguinis             | 0.063197 | 0.081760 | 0.080300  | 0.111594  | 0.553 | 0.655 |
| Actinomyces_dentalis          | 0.000020 | 0.000081 | 0.000052  | 0.000240  | 0.557 | 0.658 |
| Leptotrichia_hongkongensis    | 0.000443 | 0.001303 | 0.000838  | 0.002894  | 0.564 | 0.662 |
| Streptococcus_salivarius      | 9.355673 | 9.977574 | 11.025995 | 10.421298 | 0.570 | 0.666 |
| Prevotella_intermedia         | 0.162933 | 0.306408 | 0.128262  | 0.142820  | 0.591 | 0.689 |
| Bacteroidales_oral            | 0.000693 | 0.002657 | 0.000367  | 0.001680  | 0.594 | 0.689 |
| Cardiobacterium_valvarum      | 0.004517 | 0.007016 | 0.003262  | 0.009182  | 0.601 | 0.692 |
| Capnocytophaga_ochracea       | 0.072567 | 0.235687 | 0.045290  | 0.133491  | 0.602 | 0.692 |
| Prevotella_baroniae           | 0.000297 | 0.001155 | 0.000167  | 0.000606  | 0.604 | 0.692 |
| Porphyromonas_pasteri         | 0.832690 | 1.094066 | 0.660667  | 1.228903  | 0.610 | 0.696 |
| Neisseria_bacilliformis       | 0.001420 | 0.004222 | 0.000929  | 0.002782  | 0.619 | 0.704 |
| Leptotrichia_hofstadii        | 0.004440 | 0.008972 | 0.003500  | 0.004943  | 0.634 | 0.718 |
| Leptotrichia_trevisanii       | 0.000373 | 0.001512 | 0.000210  | 0.000960  | 0.639 | 0.719 |
| [Eubacterium]_brachy          | 0.001553 | 0.007195 | 0.002586  | 0.008090  | 0.642 | 0.719 |
| Streptococcus_anginosus       | 0.026693 | 0.098808 | 0.046890  | 0.178942  | 0.642 | 0.719 |
| Gracilibacteria_bacterium     | 0.000187 | 0.000660 | 0.000124  | 0.000342  | 0.659 | 0.730 |
| Slackia_exigua                | 0.000227 | 0.001242 | 0.000114  | 0.000524  | 0.660 | 0.730 |
| Solobacterium_moorei          | 0.264917 | 0.350750 | 0.224710  | 0.295646  | 0.660 | 0.730 |
| Prevotella_enoeca             | 0.000040 | 0.000154 | 0.000024  | 0.000109  | 0.663 | 0.730 |
| TM7_phylum                    | 0.000873 | 0.004783 | 0.000457  | 0.002095  | 0.675 | 0.741 |
| Candidatus_Aquiluna           | 0.000053 | 0.000218 | 0.000095  | 0.000436  | 0.688 | 0.752 |
| Streptococcus_peroris         | 0.000797 | 0.004364 | 0.001224  | 0.003692  | 0.708 | 0.771 |
| Rothia_mucilaginoso           | 5.253723 | 8.216198 | 4.557562  | 5.180235  | 0.713 | 0.773 |
| Leptotrichia_buccalis         | 0.209983 | 0.341634 | 0.176981  | 0.321077  | 0.727 | 0.785 |
| Kingella_denitrificans        | 0.000263 | 0.000952 | 0.000190  | 0.000641  | 0.745 | 0.802 |
| Actinomyces_viscosus          | 0.000270 | 0.001479 | 0.000171  | 0.000786  | 0.759 | 0.814 |
| Anaeroglobus_geminatus        | 0.000140 | 0.000767 | 0.000090  | 0.000415  | 0.768 | 0.820 |
| Flavobacterium_branchiophilum | 0.000260 | 0.000865 | 0.000190  | 0.000873  | 0.780 | 0.828 |
| Howardella_ureilytica         | 0.000123 | 0.000676 | 0.000186  | 0.000851  | 0.781 | 0.828 |
| Coregonus_clupeiformis        | 0.000103 | 0.000566 | 0.000152  | 0.000698  | 0.791 | 0.836 |
| Candidatus_Saccharimonas      | 0.000207 | 0.000787 | 0.000157  | 0.000720  | 0.817 | 0.860 |
| Streptococcus_sanguinis       | 0.083020 | 0.153738 | 0.094452  | 0.198100  | 0.826 | 0.866 |
| Selenomonas_sputigena         | 0.027787 | 0.074025 | 0.024543  | 0.044906  | 0.847 | 0.884 |
| Cryptobacterium_curtum        | 0.000077 | 0.000420 | 0.000100  | 0.000458  | 0.854 | 0.889 |
| Prevotella_nigrescens         | 0.020547 | 0.040130 | 0.018371  | 0.047016  | 0.864 | 0.896 |
| Prevotella_veroralis          | 0.023803 | 0.128774 | 0.019129  | 0.087658  | 0.878 | 0.907 |
| Cardiobacterium_hominis       | 0.002900 | 0.004744 | 0.003205  | 0.008532  | 0.883 | 0.909 |
| Fusobacterium_nucleatum       | 0.511770 | 0.479372 | 0.487657  | 0.717682  | 0.894 | 0.917 |
| Selenomonas_flueggei          | 0.001467 | 0.004997 | 0.001595  | 0.004535  | 0.924 | 0.943 |
| Streptococcus_cristatus       | 0.027300 | 0.052597 | 0.028386  | 0.032443  | 0.928 | 0.943 |
| Actinomyces_graevenitzi       | 0.722543 | 1.084772 | 0.750290  | 1.102593  | 0.929 | 0.943 |
| Alloprevotella_rava           | 0.197623 | 0.521587 | 0.184862  | 0.656306  | 0.941 | 0.951 |
| Kingella_oralis               | 0.001470 | 0.005333 | 0.001400  | 0.003545  | 0.955 | 0.962 |

|                                 |          |          |          |          |       |       |
|---------------------------------|----------|----------|----------|----------|-------|-------|
| Prevotella_melaninogenica       | 7.614003 | 7.171547 | 7.633257 | 6.417578 | 0.992 | 0.996 |
| Peptostreptococcaceae_bacterium | 0.002140 | 0.011721 | 0.002148 | 0.009030 | 0.998 | 0.998 |

**Supplementary table 4: Comparison of the study results to a historic control group of healthy children**

| (Abdulhaq et al., 2021)<br>N=38 neurotypical controls | Study participants CKD patients<br>N=30 CKD patients | (Abdulhaq et al., 2021)<br>N=38 neurotypical controls | Study participants CKD patients<br>N=30 CKD patients |
|-------------------------------------------------------|------------------------------------------------------|-------------------------------------------------------|------------------------------------------------------|
| Genera                                                | Genera                                               | Species                                               | Species                                              |
| Average tongue microbiome composition by genus        | Average tongue microbiome composition by genus       | Average tongue microbiome composition by species      | Average tongue microbiome composition by species     |
| Prevotella (15.3%)                                    | Prevotella (12.3%)                                   | Haemophilus parainfluenza (7.5%)                      | Haemophilus_parainfluenzae (2.8%)                    |
| Streptococcus (14.8%)                                 | Streptococcus (28.4%)                                | Rothia mucilaginosa (7.2%)                            | Rothia_mucilaginosa (11.4%)                          |
| Leptotrichia (10.5%)                                  | Leptotrichia (0.8%)                                  | Prevotella Melaninigenica (6.2%)                      | Prevotella_melaninogenica (20.2%)                    |
| Veillonella (7.9%)                                    | Veillonellaceae (6,8%)                               | Neisseria flavescens/subflava (5.8%)                  | -                                                    |
| Haemophilus (7.6%)                                    | Haemophilus (3.4%)                                   |                                                       | Neisseria_meningitidis (21.1%)                       |
| Rothia (7.3%)                                         | Rothia (7,3%)                                        | Porphyromonas sp. HOT 417 (5.5%)                      | Porphyromonas_pasteri (1.8%)                         |
| Neisseria (6.5%)                                      | Neisseria (15,8%)                                    | Veillonella parvula (5.2%)                            | Veillonella_parvula (6.7%)                           |
| Porphyromonas (5.7%)                                  | Porphyromonas (1.2%)                                 | -                                                     | Veillonella_atypica (2%)                             |
| Fusobacterium (5.0%)                                  | Fusobacterium (1.6%)                                 | Leptotrichia sp. 417 (4.9%)                           | -                                                    |
| Actinomyces (4.3%)                                    | Actinomyces (2.2%)                                   | Fusobacterium periodonticum (4.8%)                    | Fusobacterium_periodonticum (2.9%)                   |
| Granulicatella (2.6%)                                 | -                                                    | Prevotella histicola (3.7%)                           | -                                                    |
| -                                                     | Gemella (1.8%)                                       | Streptococcus Parasanguinis II (2.8%)                 | Streptococcus_parasanguinis (2.2%)                   |
|                                                       |                                                      | Streptococcus infantis (2.7%)                         | -                                                    |
|                                                       |                                                      | -                                                     | Streptococcus_Salivarius (23.7%)                     |
|                                                       |                                                      | Granulicatella adiacens (2.3%)                        | -                                                    |
|                                                       |                                                      | Leptotrichia sp. HOT 215 (1.7%)                       | -                                                    |
|                                                       |                                                      | -                                                     | Gemella_haemolysans (3.3%)                           |
|                                                       |                                                      | -                                                     | Actinomyces_graevenitzi (1.4%)                       |

**Reference of the historic controls used for comparison in Supplementary table 4:** Abdulhaq, A., Halboub, E., Homeida, H. E., Kumar Basode, V., Ghzwani, A. H., Zain, K. A., . . . Al-Hebshi, N. N. (2021). Tongue microbiome in children with autism spectrum disorder. *J Oral Microbiol*, 13(1), 1936434. doi:10.1080/20002297.2021.1936434
